# Supplementary material
Source: PubMed Central journal article supplement (PMC6785039)
Supplement: NIHMS1537254-supplement-2.pdf [file NIHMS1537254-supplement-2.pdf]

Supplementary Figure  
Original source images for data obtained by electrophoretic separation  
Figure 3a

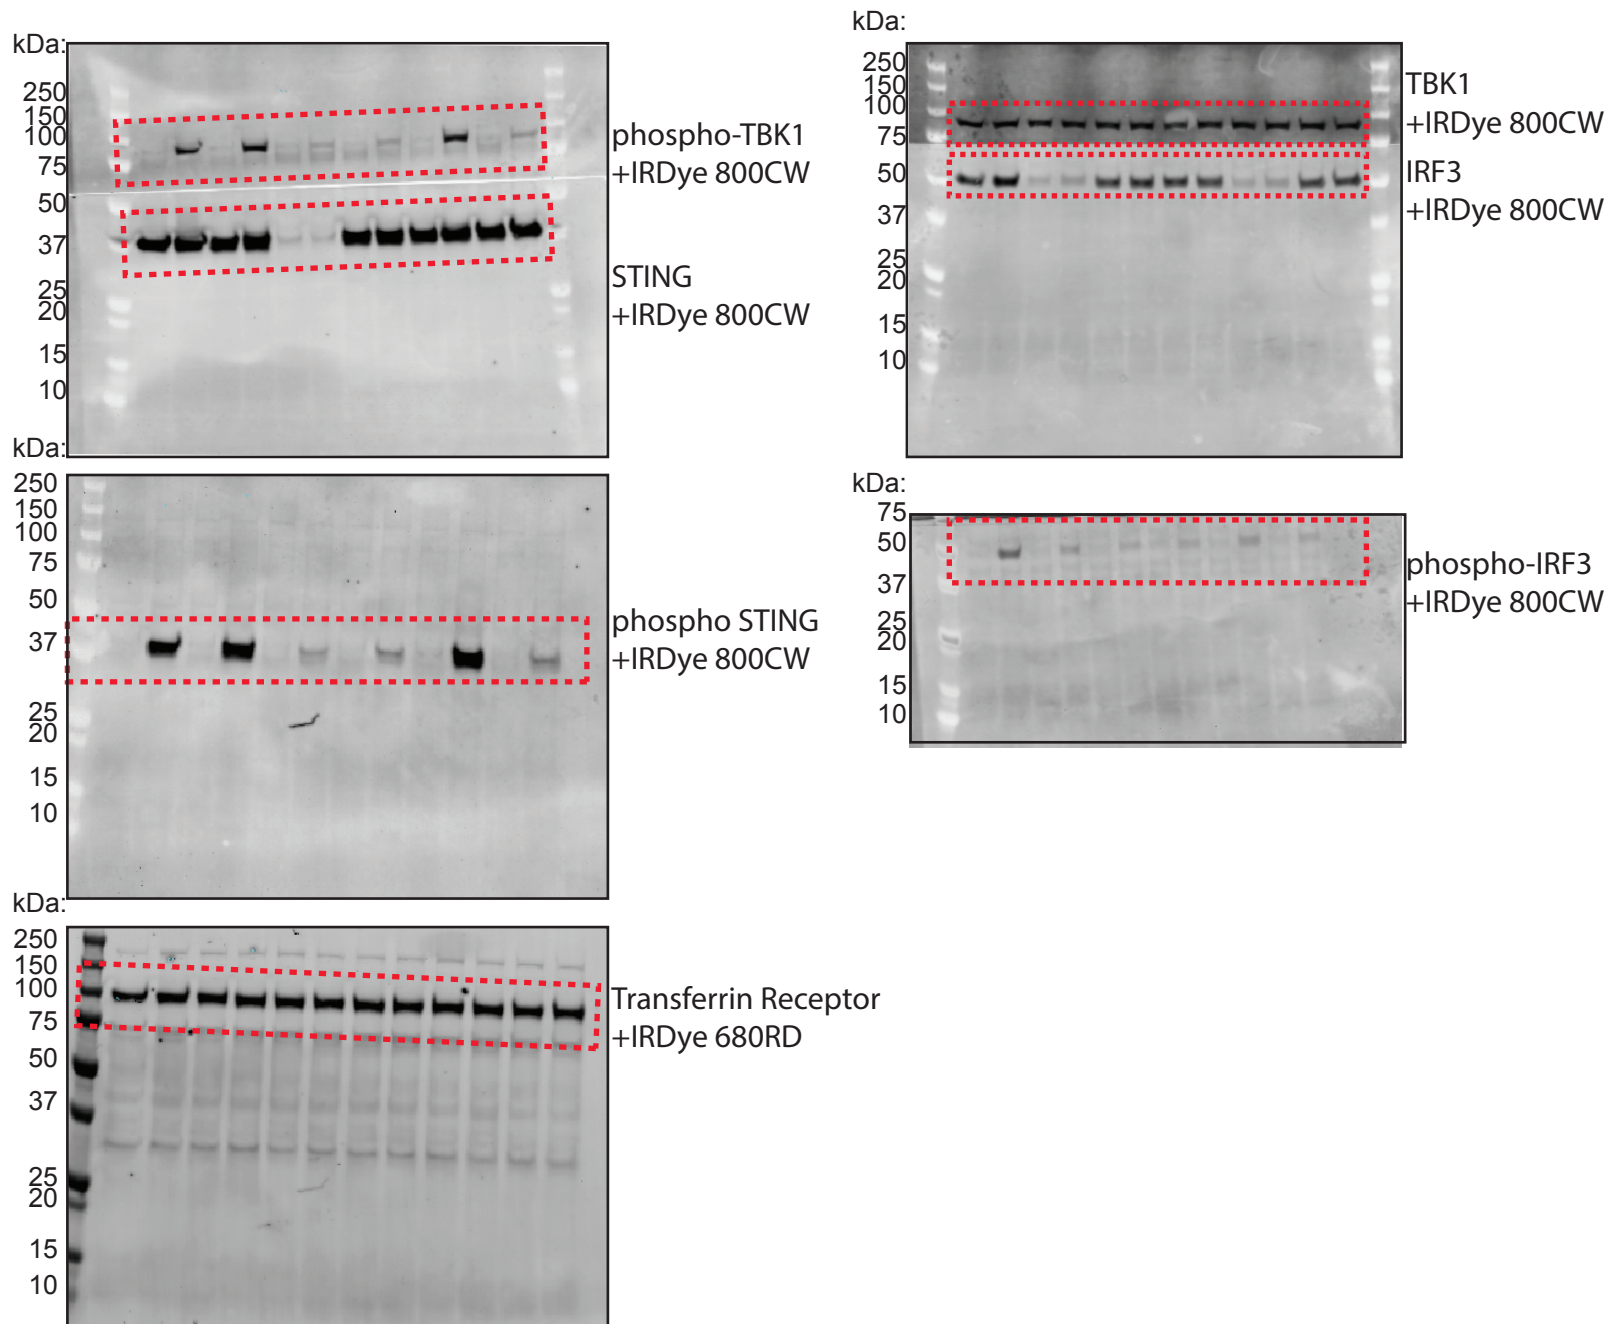

**Western blot** of membrane probed with up to 2 primary and secondary antibodies, visualized in two fluorescent channels

**Primary antibodies:** 1:1000 Rabbit anti-phospho-TBK1 (Cell Signalling technologies Cat.# 5483), 1:1000; Rabbit anti-Phospho STING (Cell Signalling Technologies Cat.# 19781S), 1:2000 Rabbit anti-STING (Cell Signalling Technologies Cat.# 13647); 1:1000 Rabbit anti-TBK1 (Cell Signalling Technologies Cat.# 3504); 1:1000 Mouse anti-Transferrin Receptor (Thermo Fischer Scientific Cat.# 13-6800); 1:2000 Rabbit-anti IRF3 (Abcam Cat.# EP2419Y); 1:1000 Rabbit anti-phospho-TBK1 (Cell Signalling Technologies Cat.# 4947)

**Secondary antibodies:** 1:5000 IRDye 800CW Donkey anti-Rabbit IgG (LI-COR Biosciences Cat.# 926-32213); 1:5000 IRDye 680RD Donkey anti-Rabbit IgG (LI-COR Biosciences Cat.# 926-68073) and IRDye 680RD Goat anti-Mouse IgG (LI-COR Biosciences Cat.# 926-68070).

**Ladder:** Odyssey one-color protein molecular weight ladder (LI-C)OR Biosciences Cat.# 928-40000)

Supplementary Figure  
Original source images for data obtained by electrophoretic separation  
Figure 3c

phospho STING  
+IRDye 800CW

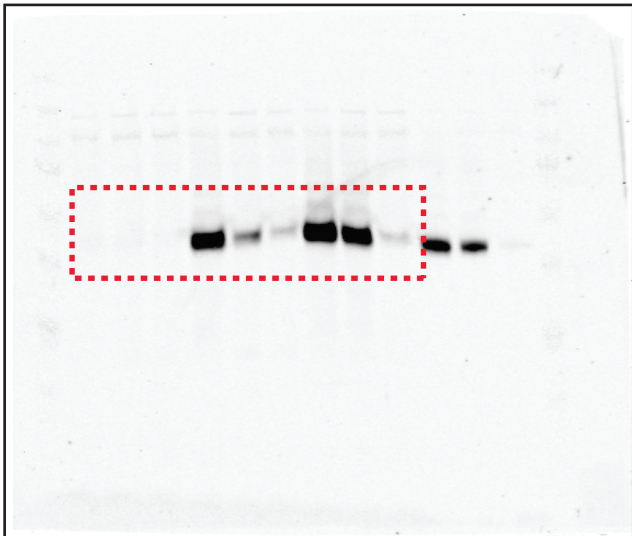

Transferrin Receptor  
+IRDye 680RD

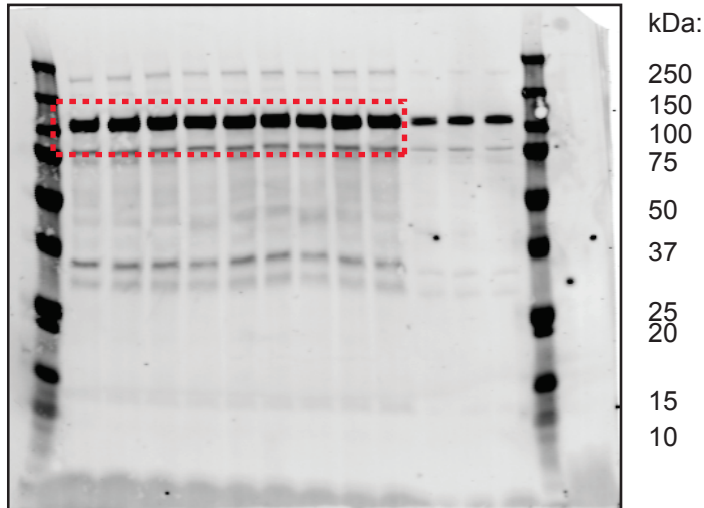

Supplementary Figure  
Original source images for data obtained by electrophoretic separation  
Figure 3d

phospho STING  
+IRDye 800CW

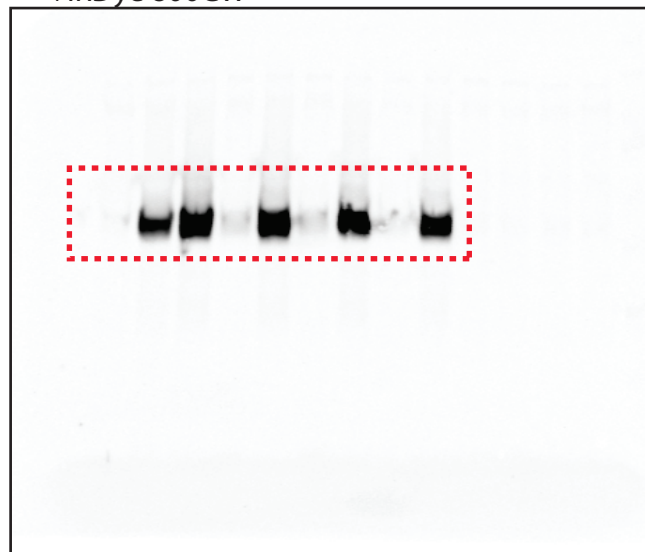

Transferrin Receptor  
+IRDye 680RD

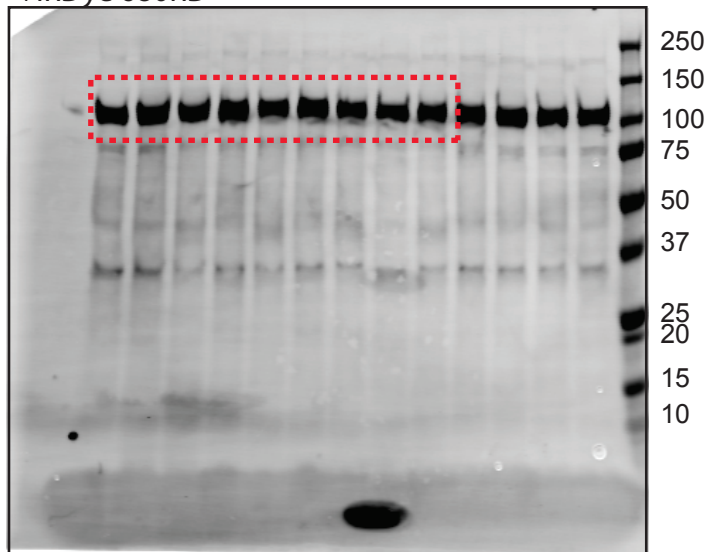

**Western blot** of one membrane probed with 2 primary and secondary antibodies, visualized in two fluorescent channels  
**Primary antibodies:** 1:1000 Rabbit anti-Phospho STING (Cell Signalling Technologies Cat. #: 19781S) 1:1000 Mouse anti-Transferrin Receptor (Thermo Fischer Scientific Cat.# 13-6800).  
**Secondary antibodies:** 1:5000 IRDye 800CW Donkey anti-Rabbit IgG (LI-COR Biosciences Cat.# 926-32213) and IRDye 680RD Goat anti-Mouse IgG (LI-COR Biosciences Cat# 926-68070).  
**Ladder:** Odyssey one-color protein molecular weight ladder (LI-C)OR Biosciences Cat.# 928-40000)

Supplementary Figure  
Original source images for data obtained by electrophoretic separation  
Figure 4g

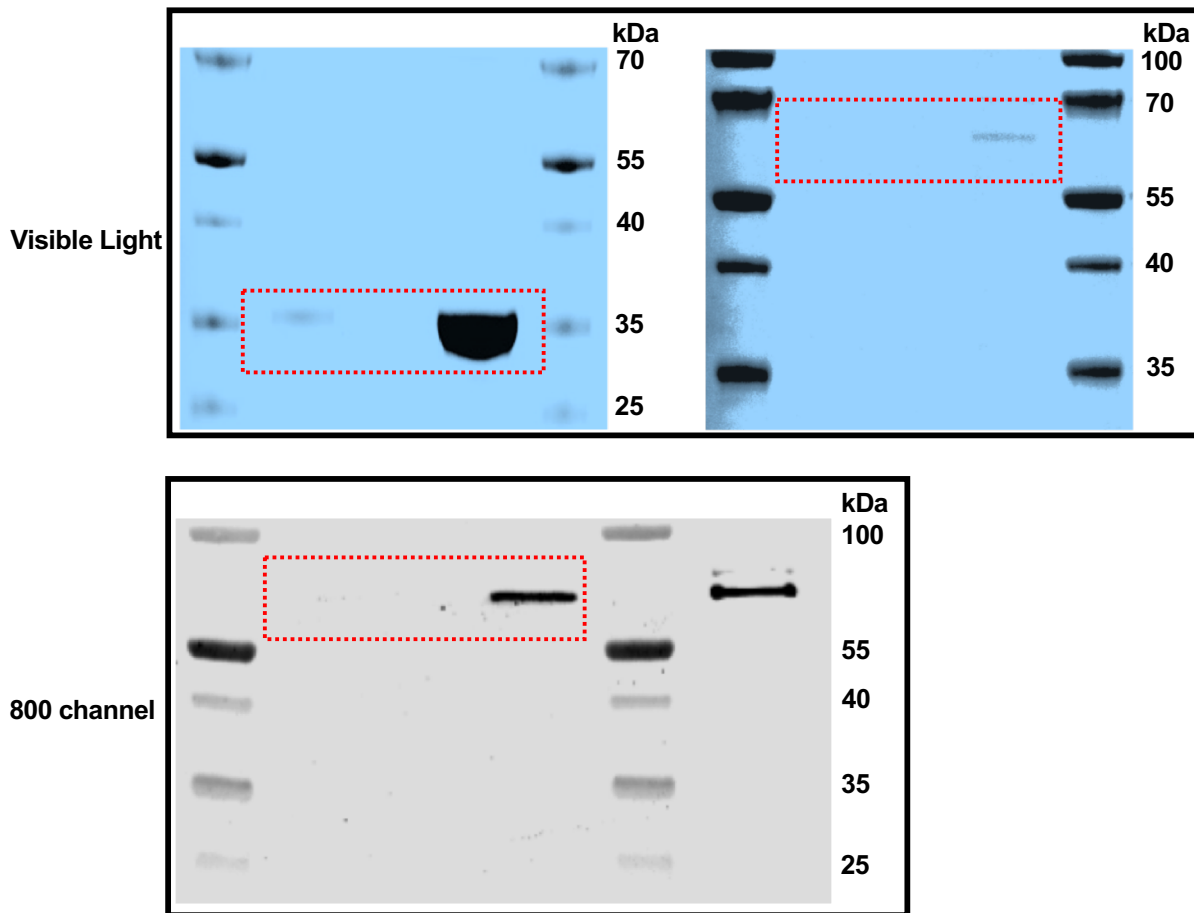

**Coomasie Stain** of two gels stained with Coomassie stain, visualized under visible light

**Western blot** of one gel/membrane probed with 1 set of primary and secondary antibodies separately, visualized in one fluorescence channel

**Primary antibodies** 0.3  $\mu\text{g}/\text{mL}$  Rabbit anti-SLC19A1 (Boster Biological Technology Cat# PB9504 )

**Secondary antibodies** 1:10,000 IRDye 800CW Goat anti-Rabbit IgG (LI-COR Biosciences Cat# 926-32211)

**Ladder** Thermo Scientific PageRuler Prestained Protein Ladder

Supplementary Figure  
Original source images for data obtained by electrophoretic separation  
Figure 4h

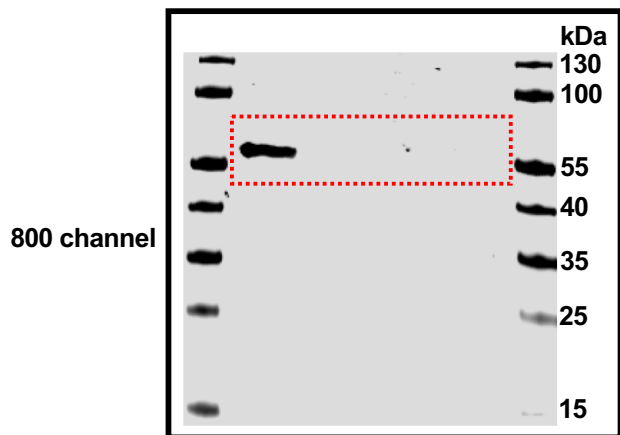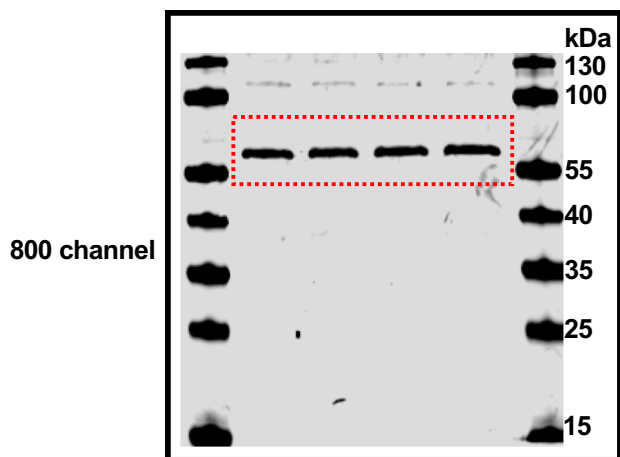

**Western blot** of two gel/membranes probed with 1 set of primary and secondary antibodies separately, visualized in one fluorescence channel

**Primary antibodies** 0.3 µg/mL Rabbit anti-SLC19A1 (Boster Biological Technology Cat# PB9504 )

**Secondary antibodies** 1:10,000 IRDye 800CW Goat anti-Rabbit IgG (LI-COR Biosciences Cat# 926-32211)

**Ladder** Thermo Scientific PageRuler Prestained Protein Ladder

Supplementary Figure  
Original source images for data obtained by electrophoretic separation  
Extended Data Figure 5c

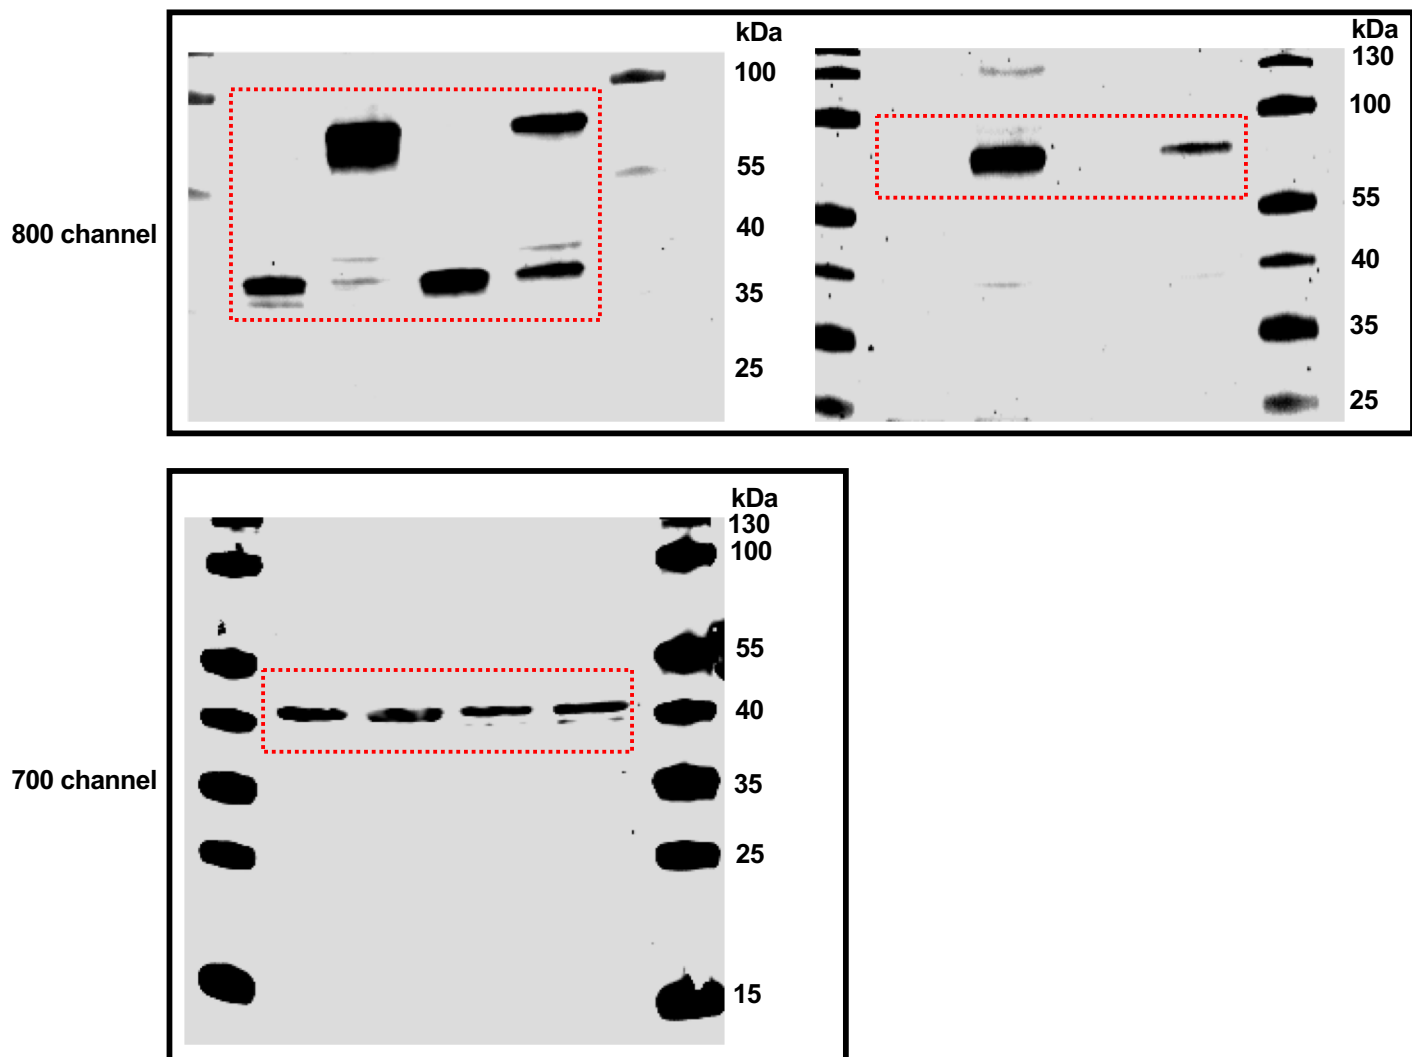

**Western blot** of one gel/membrane probed with 3 sets of primary and secondary antibodies separately, visualized in two fluorescence channels

**Primary antibodies** 1:1,000 Rabbit anti-STING (Cell Signaling Technology Cat# 13647S), 1:1,000 Rabbit anti-Phospho STING (Cell Signaling Technology Cat# 19781S), 1:1,000 Mouse anti-Beta Actin (Cell Signaling Technology Cat# 3700S),

**Secondary antibodies** 1:10,000 IRDye 800CW Goat anti-Rabbit IgG (LI-COR Biosciences Cat# 926-32211) and IRDye 680RD Goat anti-Mouse IgG (LI-COR Biosciences Cat# 926-68070).

**Ladder** Thermo Scientific PageRuler Prestained Protein Ladder

Supplementary Figure  
Original source images for data obtained by electrophoretic separation  
Extended Data Figure 8c

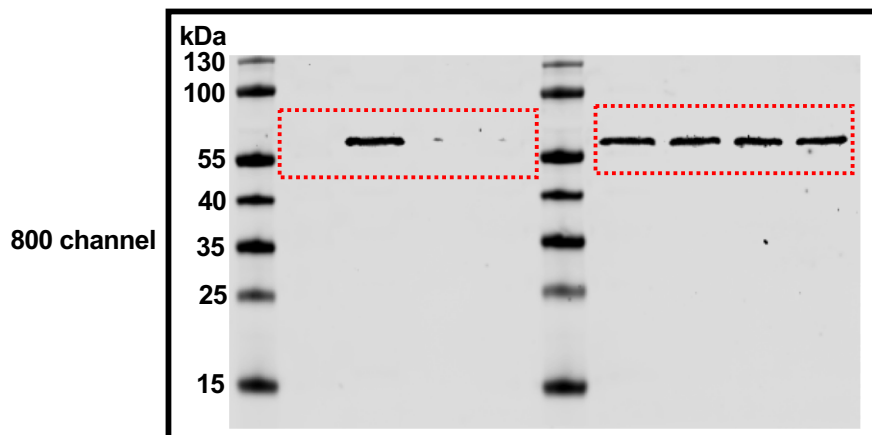

**Western blot** of one gel/membrane probed with 1 set of primary and secondary antibodies separately, visualized in one fluorescence channel

**Primary antibodies** 0.3  $\mu\text{g}/\text{mL}$  Rabbit anti-SLC19A1 (Boster Biological Technology Cat# PB9504 )

**Secondary antibodies** 1:10,000 IRDye 800CW Goat anti-Rabbit IgG (LI-COR Biosciences Cat# 926-32211)

**Ladder** Thermo Scientific PageRuler Prestained Protein Ladder
